# Supplementary material for: Propolis Exerts an Anti-Inflammatory Effect on PMA-Differentiated THP-1 Cells via Inhibition of Purine Nucleoside Phosphorylase
Source: PubMed Central journal article supplement (PMC6523283; doi:10.3390/metabo9040075), 2019-04-16
Supplement: metabolites-09-00075-s001.pdf [file metabolites-09-00075-s001.pdf]

# Propolis Exerts an Anti-inflammatory Effect on PMA-Differentiated THP-1 Cells via Inhibition of Purine Nucleoside Phosphorylase

Abdulmalik M. Alqarni, Kanidta Niwasabutra, Muhamad Sahlan, Hugo Fearnley, James Fearnley, Valerie A. Ferro and David G. Watson

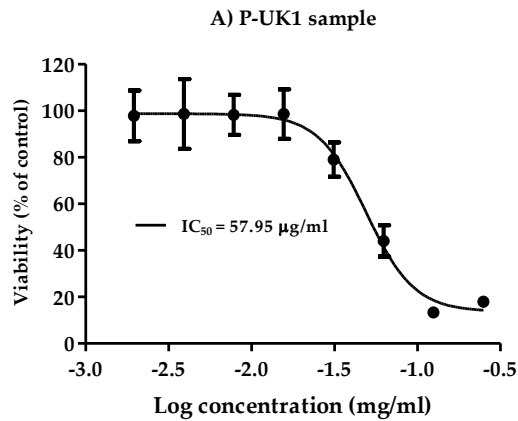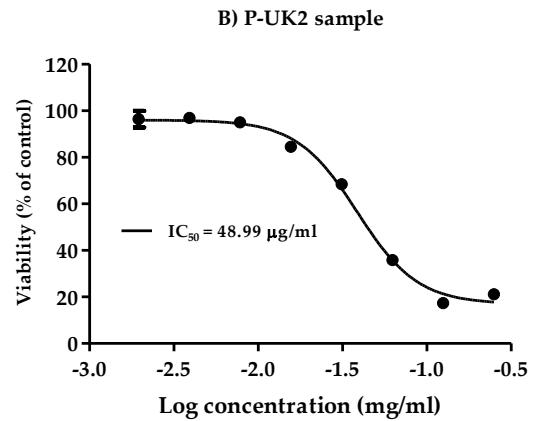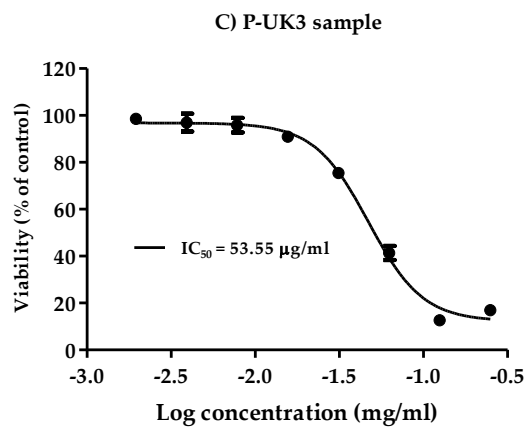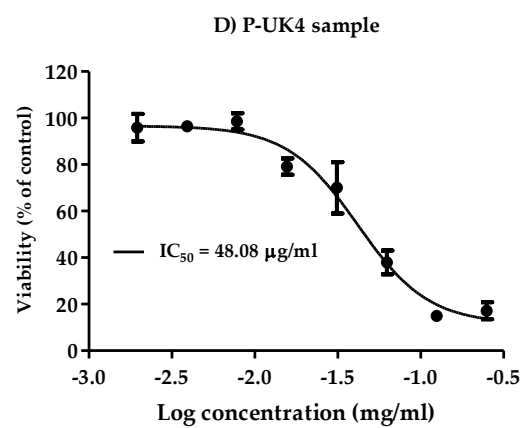

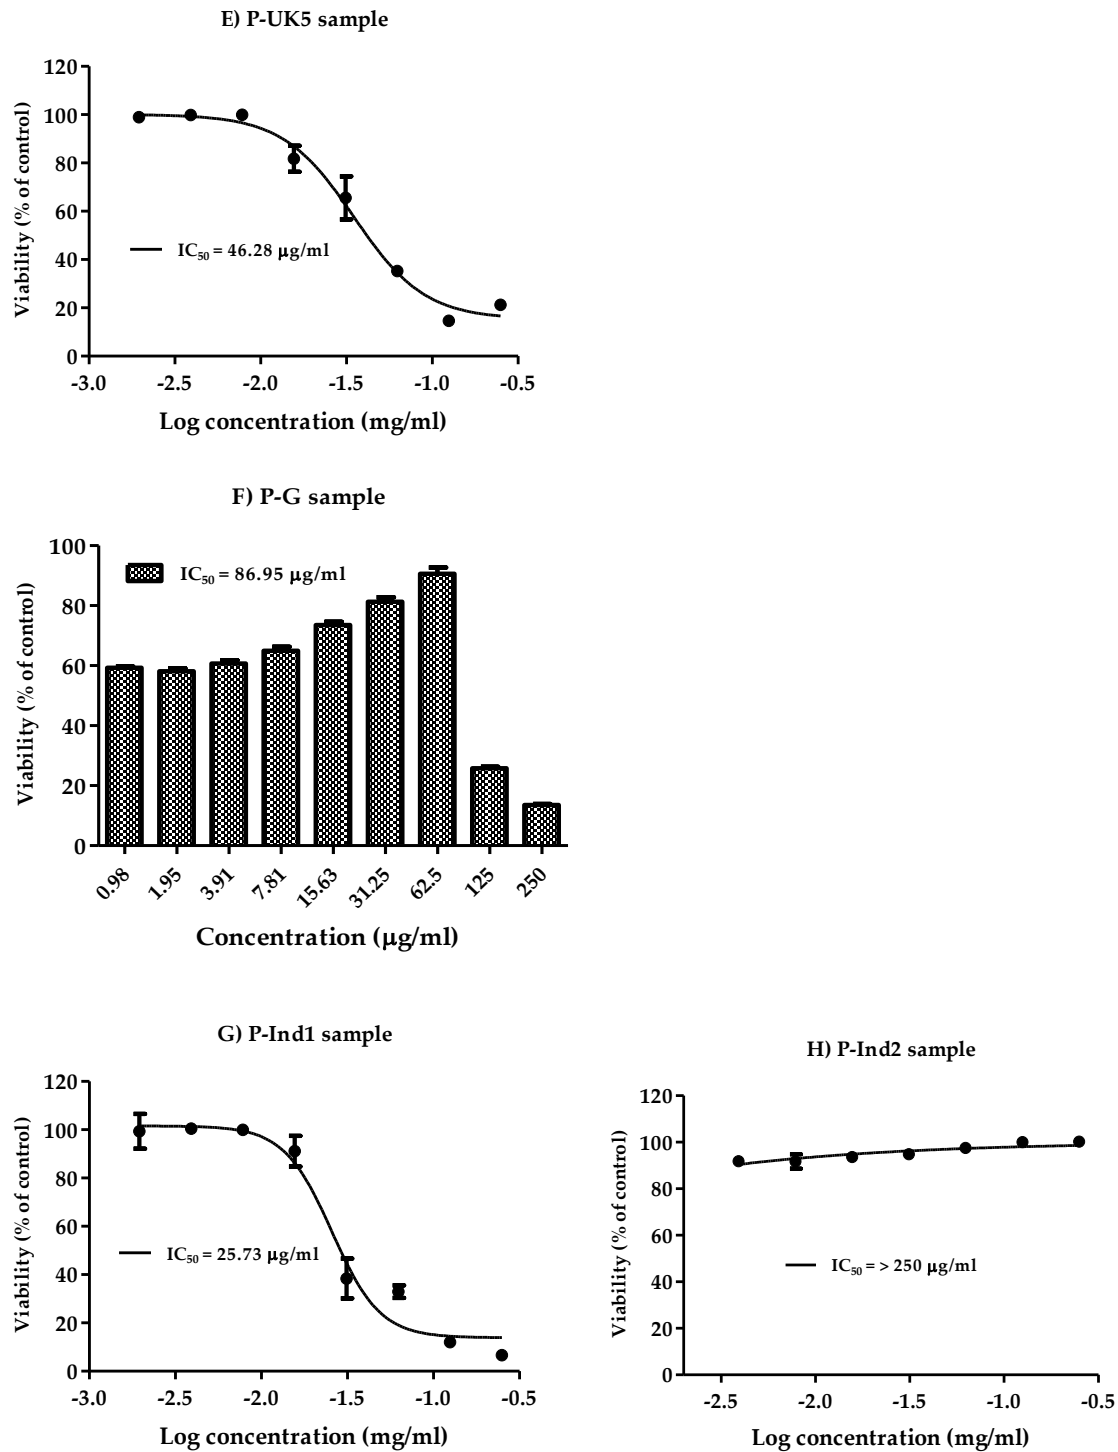

**Figure S1:** Cytotoxic effects of propolis extracts at varying doses on phorbol 12-myristate 13-acetate (PMA)-differentiated THP-1 cells. Each data point represents the mean  $\pm$  SD ( $n=3$ ).

P-UK (1-5): Five propolis extracts from the UK; P-G: Propolis from Ghana; P-Ind (1 and 2): Two Propolis extracts from Indonesia.

### TNF- $\alpha$ production

**Table S1:** Effect of propolis extracts on the production of TNF- $\alpha$  cytokines in the presence and absence of LPS on PMA-differentiated THP-1 cells (n=3).

| Propolis Samples | TNF- $\alpha$ concentration (pg/ml) |      |      |         |        |              |      |      |         |       |
|------------------|-------------------------------------|------|------|---------|--------|--------------|------|------|---------|-------|
|                  | Sample only                         |      |      |         |        | Sample + LPS |      |      |         |       |
|                  | n=1                                 | n=2  | n=3  | Mean    | RSD    | n=1          | n=2  | n=3  | Mean    | RSD   |
| <b>P-UK1</b>     | 21                                  | 2    | 94   | 39.00   | 124.54 | 981          | 1796 | 2093 | 1623.33 | 35.47 |
| <b>P-UK2</b>     | 31                                  | 52   | 215  | 99.33   | 101.40 | 1526         | 1824 | 2112 | 1820.67 | 16.09 |
| <b>P-UK3</b>     | 60                                  | 23   | 138  | 73.67   | 79.69  | 1304         | 1817 | 2089 | 1736.67 | 22.95 |
| <b>P-UK4</b>     | 136                                 | 79   | 277  | 164.00  | 62.15  | 1573         | 1838 | 2121 | 1844.00 | 14.86 |
| <b>P-UK5</b>     | 103                                 | 39   | 158  | 100.00  | 59.56  | 1519         | 1788 | 2136 | 1814.33 | 17.05 |
| <b>P-G</b>       | 110                                 | 72   | 124  | 102.00  | 26.38  | 1218         | 1805 | 2104 | 1709.00 | 26.37 |
| <b>P-C</b>       | 80                                  | 14   | 50   | 48.00   | 68.84  | 816          | 1813 | 2085 | 1571.33 | 42.52 |
| <b>P-Ind1</b>    | 214                                 | 212  | 373  | 266.33  | 34.69  | 1237         | 1821 | 2141 | 1733.00 | 26.45 |
| <b>P-Ind2</b>    | <2.0                                | <2.0 | <2.0 | n/a     | n/a    | 369          | 711  | 233  | 437.67  | 56.27 |
| <b>Media</b>     | 113                                 | 132  | 196  | 147.00  | 29.58  |              |      |      |         |       |
| <b>LPS</b>       | 1521                                | 1885 | 2183 | 1863.00 | 17.80  |              |      |      |         |       |

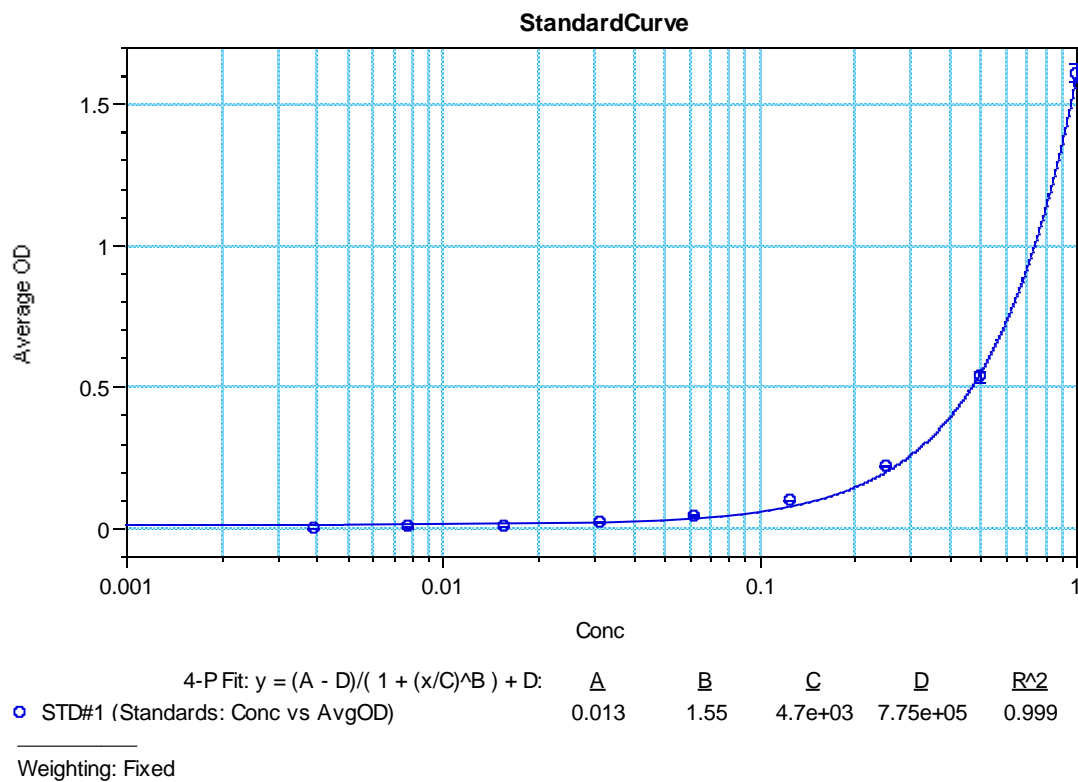

**Figure S2:** A representative 4-parameter logistic plot of TNF- $\alpha$  standard samples of 9 points showing the values of a, b, c, and d constants and the calibration equation with a perfect fit ( $R^2=0.999$ ). The data represents the mean  $\pm$  SD of optical density (OD) values for duplicate standard concentrations ( $n=2$ ).

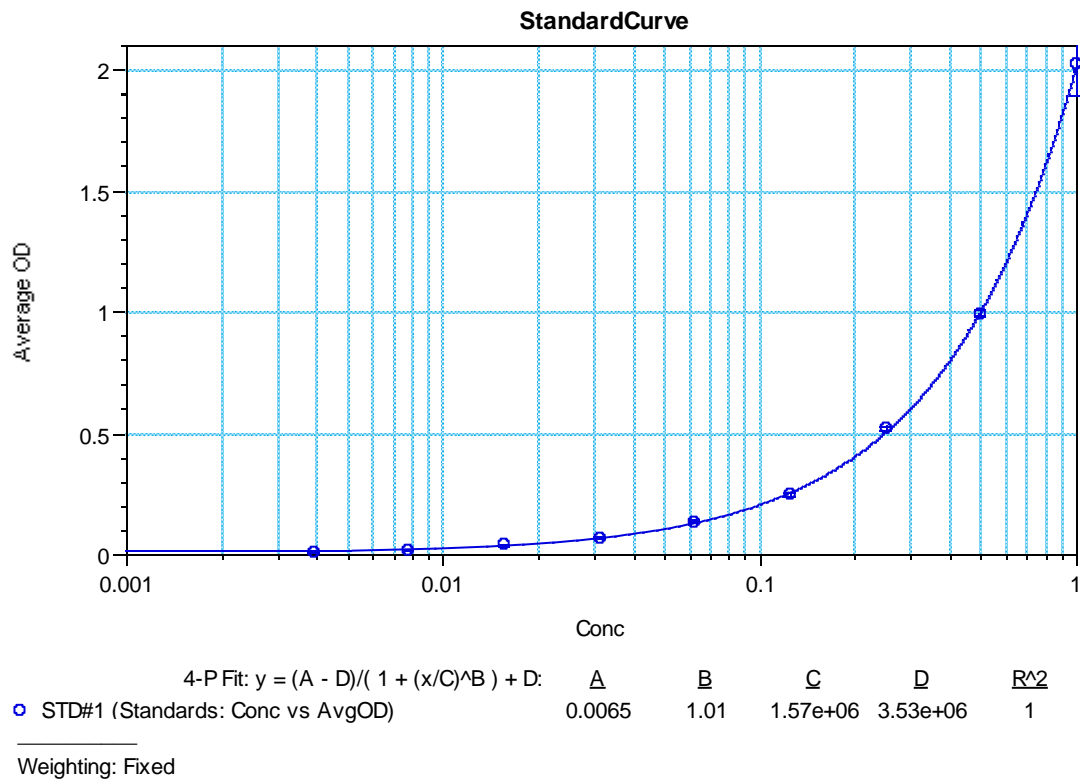

**Figure S3:** A representative 4-parameter logistic plot of TNF- $\alpha$  standard samples of 9 points showing the values of a, b, c, and d constants and the calibration equation with a perfect fit ( $R^2=1.0$ ). The data represents the mean  $\pm$  SD of optical density (OD) values for duplicate standard concentrations ( $n=2$ ).

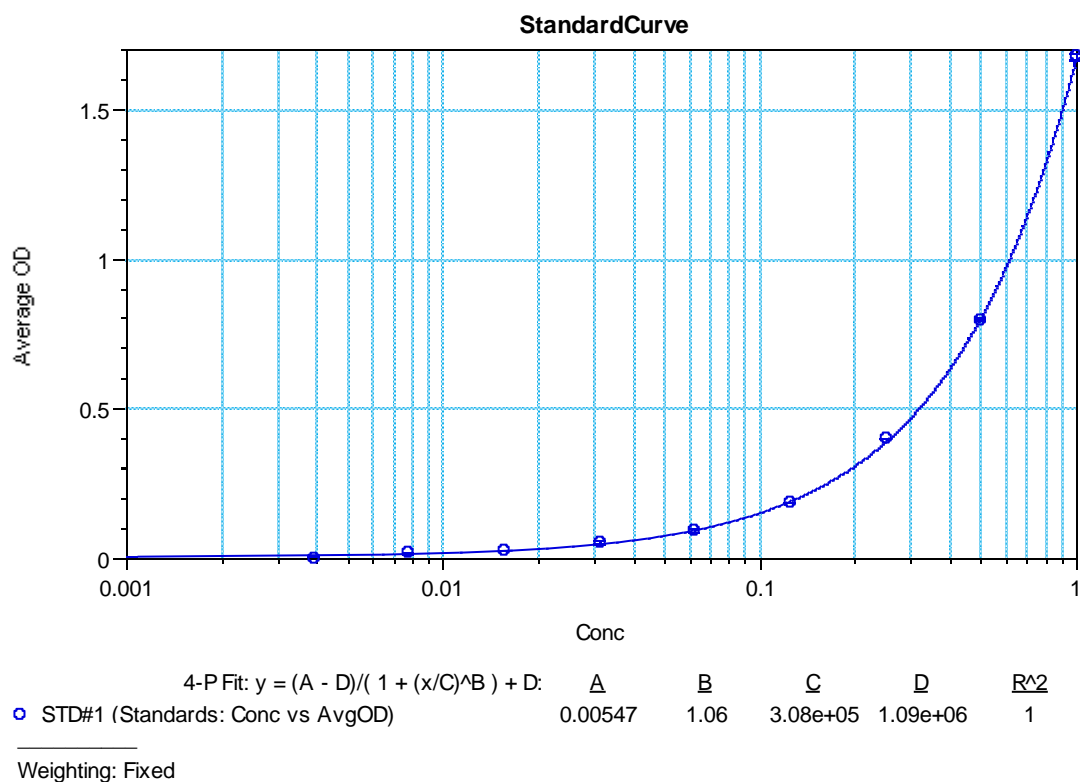

**Figure S4:** A representative 4-parameter logistic plot of TNF- $\alpha$  standard samples of 9 points showing the values of a, b, c, and d constants and the calibration equation with a perfect fit ( $R^2=1.0$ ). The data represents the mean  $\pm$  SD of optical density (OD) values for duplicate standard concentrations ( $n=2$ ).

**IL-1 $\beta$  production****Table S2:** Effect of propolis extracts on the production of IL-1 $\beta$  cytokines in the presence and absence of LPS on PMA-differentiated THP-1 cells (n=3).

| Propolis<br>Samples | <i>IL-1<math>\beta</math> concentration (pg/ml)</i> |       |       |       |       |              |        |        |        |       |
|---------------------|-----------------------------------------------------|-------|-------|-------|-------|--------------|--------|--------|--------|-------|
|                     | Sample only                                         |       |       |       |       | Sample + LPS |        |        |        |       |
|                     | n=1                                                 | n=2   | n=3   | Mean  | RSD   | n=1          | n=2    | n=3    | Mean   | RSD   |
| <b>P-UK1</b>        | 19.00                                               | 33.00 | 10.00 | 20.67 | 56.08 | 59.00        | 58.00  | 89.00  | 68.67  | 25.65 |
| <b>P-UK2</b>        | 28.00                                               | 21.00 | 14.00 | 21.00 | 33.33 | 36.00        | 52.00  | 47.00  | 45.00  | 18.19 |
| <b>P-UK3</b>        | 7.00                                                | 17.00 | 14.00 | 12.67 | 40.51 | 29.00        | 41.00  | 60.00  | 43.33  | 36.07 |
| <b>P-UK4</b>        | 5.00                                                | 12.00 | 11.00 | 9.33  | 40.56 | 27.00        | 42.00  | 42.00  | 37.00  | 23.41 |
| <b>P-UK5</b>        | 8.00                                                | 20.00 | 12.00 | 13.33 | 45.83 | 28.00        | 41.00  | 57.00  | 42.00  | 34.59 |
| <b>P-G</b>          | 36.00                                               | 46.00 | 44.00 | 42.00 | 12.60 | 110.00       | 89.00  | 112.00 | 103.67 | 12.29 |
| <b>P-C</b>          | 14.00                                               | 37.00 | 9.00  | 20.00 | 74.67 | 50.00        | 31.00  | 32.00  | 37.67  | 28.39 |
| <b>P-Ind1</b>       | 9.00                                                | 18.00 | 12.00 | 13.00 | 35.25 | 79.00        | 77.00  | 120.00 | 92.00  | 26.38 |
| <b>P-Ind2</b>       | 27.00                                               | 28.00 | 13.00 | 22.67 | 37.00 | 93.00        | 108.00 | 110.00 | 103.67 | 8.96  |
| <b>Media</b>        | 6.00                                                | 10.00 | 16.00 | 10.67 | 5.03  |              |        |        |        |       |
| <b>LPS</b>          | 60.00                                               | 60.00 | 63.00 | 61.00 | 1.73  |              |        |        |        |       |

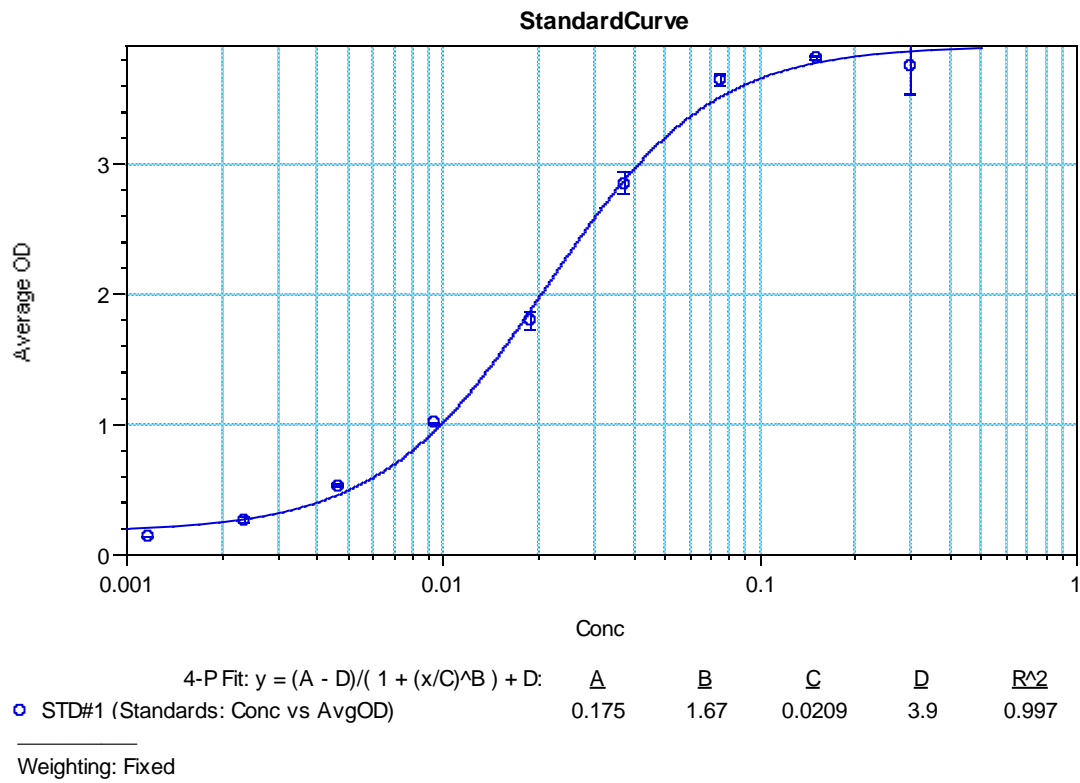

**Figure S5:** A representative 4-parameter logistic plot of IL-1 $\beta$  standard samples of 9 points showing the values of a, b, c, and d constants and the calibration equation with a good fit ( $R^2=0.997$ ). The data represents the mean  $\pm$  SD of optical density (OD) values for duplicate standard concentrations ( $n=2$ ).



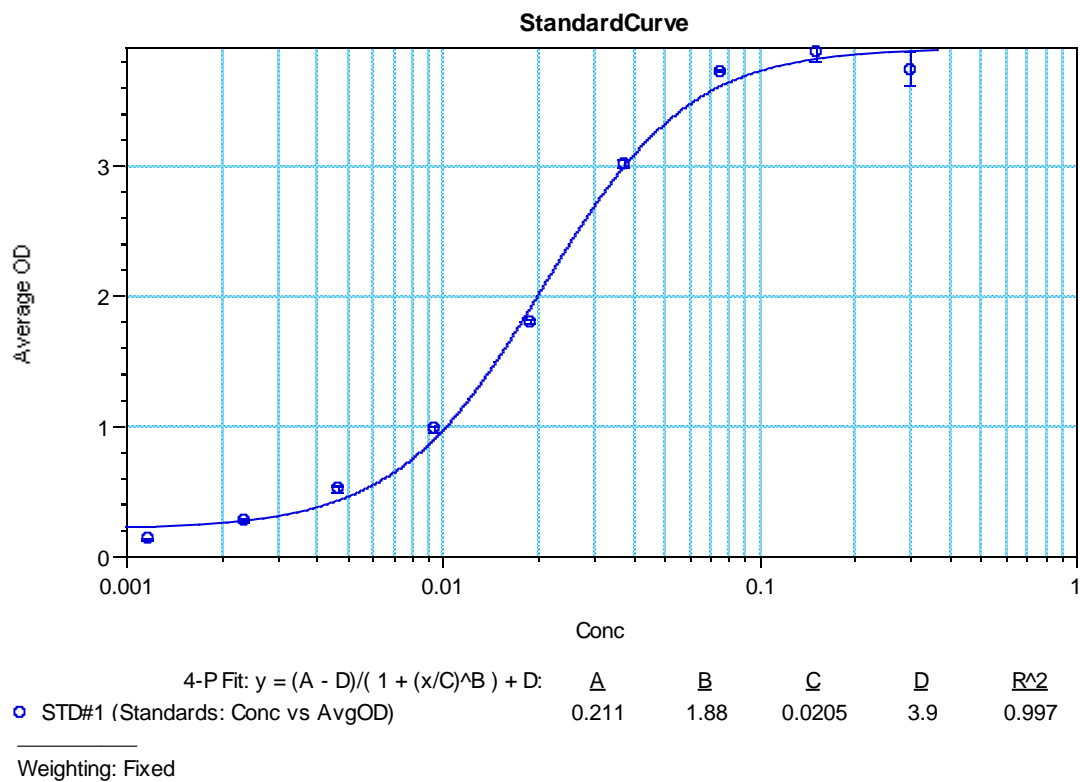

**Figure S6:** A representative 4-parameter logistic plot of IL-1 $\beta$  standard samples of 9 points showing the values of a, b, c, and d constants and the calibration equation with a good fit ( $R^2=0.997$ ). The data represents the mean  $\pm$  SD of optical density (OD) values for duplicate standard concentrations ( $n=2$ ).

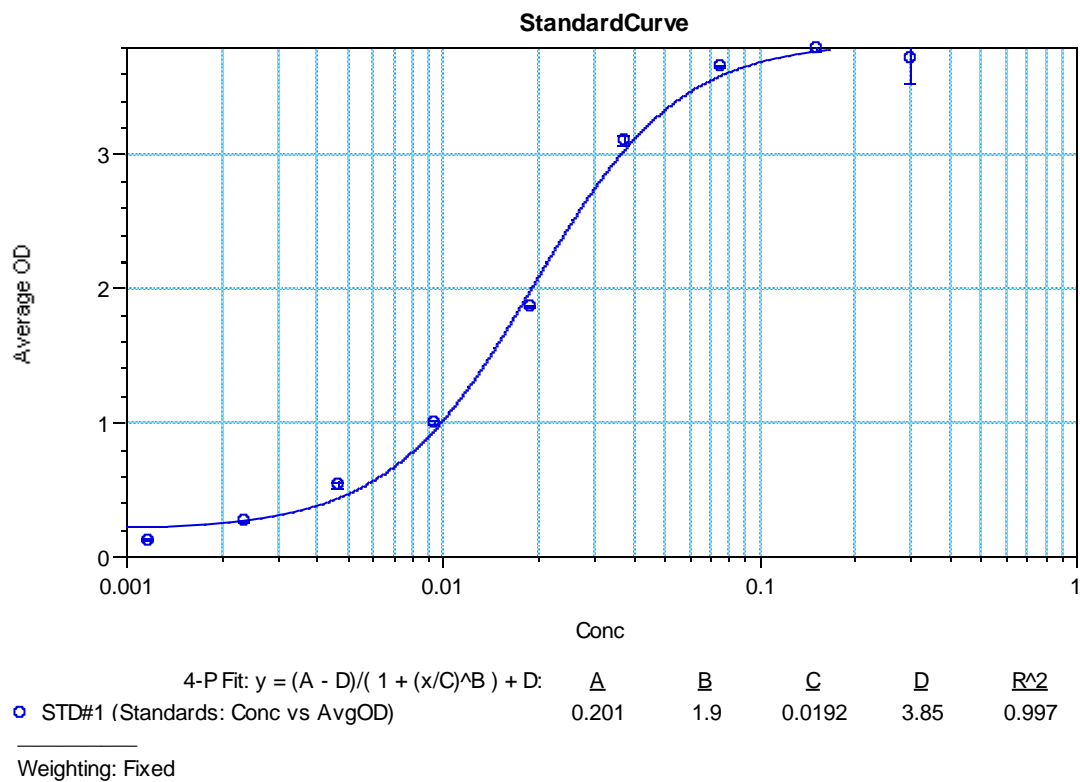

**Figure S7:** A representative 4-parameter logistic plot of IL-1 $\beta$  standard samples of 9 points showing the values of a, b, c, and d constants and the calibration equation with a good fit ( $R^2=0.997$ ). The data represents the mean  $\pm$  SD of optical density (OD) values for duplicate standard concentrations ( $n=2$ ).

**IL-6 production****Table S3:** Effect of propolis extracts on the production of IL-6 cytokines in the presence and absence of LPS on PMA-differentiated THP-1 cells (n=3).

| Propolis Samples | <i>IL-6 concentration (pg/ml)</i> |      |      |      |       |              |      |     |       |       |
|------------------|-----------------------------------|------|------|------|-------|--------------|------|-----|-------|-------|
|                  | Sample only                       |      |      |      |       | Sample + LPS |      |     |       |       |
|                  | n=1                               | n=2  | n=3  | Mean | RSD   | n=1          | n=2  | n=3 | Mean  | RSD   |
| <b>P-UK1</b>     | <2.0                              | <2.0 | <2.0 | n/a  | n/a   | 13           | 11   | 12  | 12.00 | 8.33  |
| <b>P-UK2</b>     | <2.0                              | <2.0 | <2.0 | n/a  | n/a   | 47           | 37   | 49  | 44.33 | 14.50 |
| <b>P-UK3</b>     | <2.0                              | <2.0 | <2.0 | n/a  | n/a   | 46           | 34   | 49  | 43.00 | 18.46 |
| <b>P-UK4</b>     | <2.0                              | <2.0 | <2.0 | n/a  | n/a   | 55           | 48   | 65  | 56.00 | 15.26 |
| <b>P-UK5</b>     | <2.0                              | <2.0 | <2.0 | n/a  | n/a   | 53           | 45   | 49  | 49.00 | 8.16  |
| <b>P-G</b>       | <2.0                              | <2.0 | <2.0 | n/a  | n/a   | 19           | 20   | 20  | 19.67 | 2.94  |
| <b>P-C</b>       | <2.0                              | <2.0 | <2.0 | n/a  | n/a   | 26           | 25   | 20  | 23.67 | 13.58 |
| <b>P-Ind1</b>    | <2.0                              | <2.0 | <2.0 | n/a  | n/a   | 50           | 39   | 41  | 43.33 | 13.52 |
| <b>P-Ind2</b>    | <2.0                              | <2.0 | <2.0 | n/a  | n/a   | 1            | <2.0 | 1   | 1     | n/a   |
| <b>Media</b>     | <2.0                              | <2.0 | <2.0 | n/a  | n/a   |              |      |     |       |       |
| <b>LPS</b>       | 111                               | 113  | 82   | 102  | 17.01 |              |      |     |       |       |

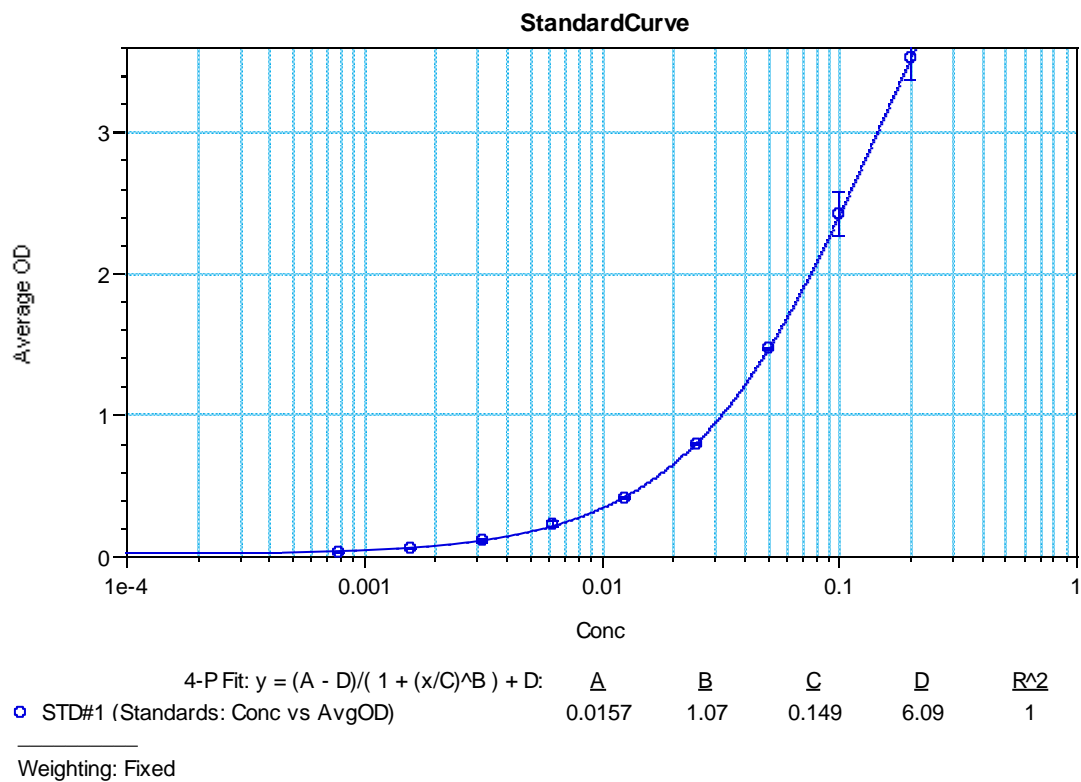

**Figure S8:** A representative 4-parameter logistic plot of IL-6 standard samples of 8 points showing the values of a, b, c, and d constants and the calibration equation with a perfect fit ( $R^2=1$ ). The data represents the mean  $\pm$  SD of optical density (OD) values for duplicate standard concentrations ( $n=2$ ).

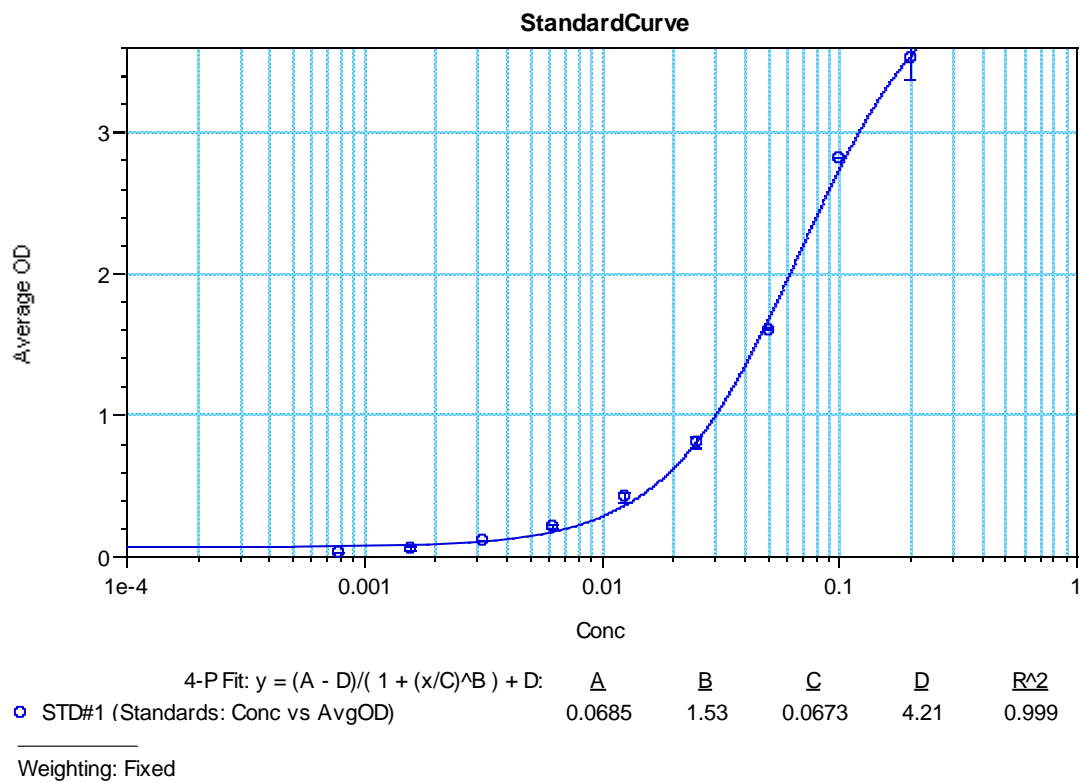

**Figure S9:** A representative 4-parameter logistic plot of IL-6 standard samples of 8 points showing the values of a, b, c, and d constants and the calibration equation with a perfect fit ( $R^2=0.999$ ). The data represents the mean  $\pm$  SD of optical density (OD) values for duplicate standard concentrations ( $n=2$ )

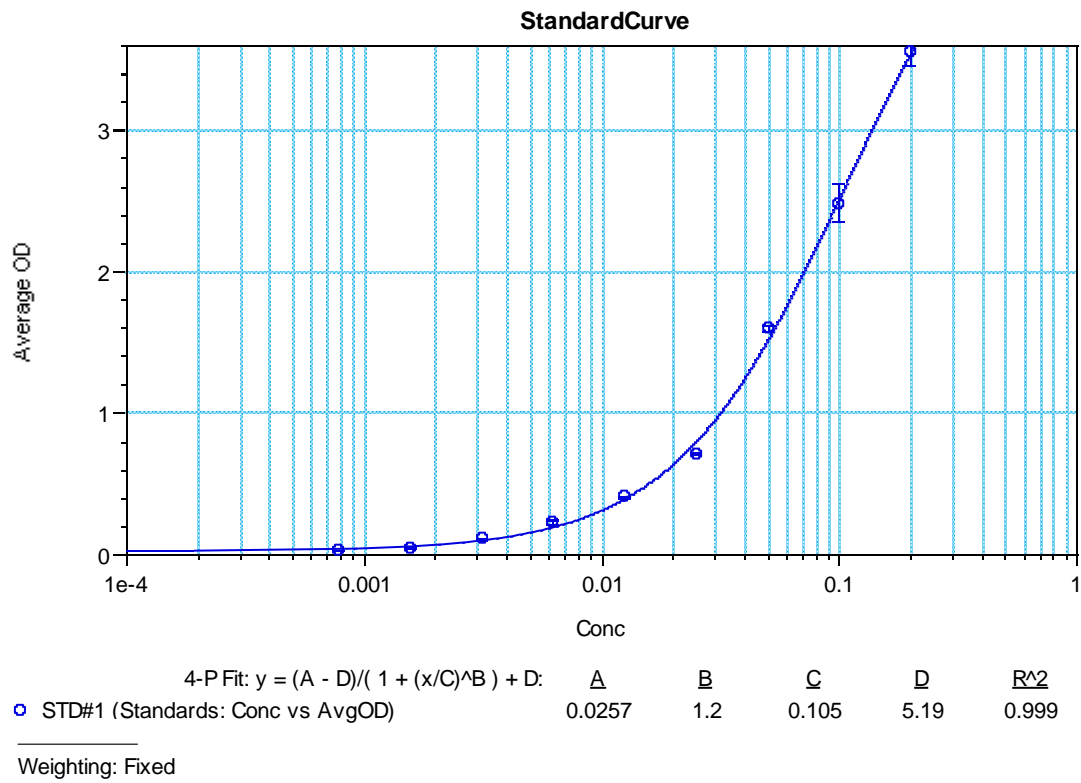

**Figure S10:** A representative 4-parameter logistic plot of IL-6 standard samples of 8 points showing the values of a, b, c, and d constants and the calibration equation with a perfect fit (R<sup>2</sup>=0.999). The data represents the mean ± SD of optical density (OD) values for duplicate standard concentrations (n=2).

**IL-10 production****Table S4:** Effect of propolis extracts on the production of IL-10 cytokines in the presence and absence of LPS on PMA-differentiated THP-1 cells (n=3).

| Propolis Samples | <i>IL-10 concentration (pg/ml)</i> |       |       |       |       |              |      |      |       |       |
|------------------|------------------------------------|-------|-------|-------|-------|--------------|------|------|-------|-------|
|                  | Sample only                        |       |       |       |       | Sample + LPS |      |      |       |       |
|                  | n=1                                | n=2   | n=3   | Mean  | RSD   | n=1          | n=2  | n=3  | Mean  | RSD   |
| P-UK1            | 16                                 | 19    | 5     | 13.33 | 55.28 | 18           | 10   | 7    | 11.67 | 48.74 |
| P-UK2            | 21                                 | 25    | 7     | 17.67 | 53.50 | 16           | 13   | 11   | 13.33 | 18.87 |
| P-UK3            | 11                                 | 26    | 6     | 14.33 | 72.62 | 14           | 12   | 10   | 12.00 | 16.67 |
| P-UK4            | 14                                 | 17    | 8     | 13.00 | 35.25 | 19           | 15   | 13   | 15.67 | 19.50 |
| P-UK5            | 15                                 | 25    | 8     | 16.00 | 53.40 | 17           | 14   | 11   | 14.00 | 21.43 |
| P-G              | 9                                  | 12    | 4     | 8.33  | 48.50 | 13           | 8    | 7    | 9.33  | 34.44 |
| P-C              | 19                                 | 25    | 6     | 16.67 | 58.28 | 33           | 14   | 10   | 19.00 | 64.67 |
| P-Ind1           | 14                                 | 18    | 5     | 12.33 | 53.99 | 31           | 17   | 11   | 19.67 | 52.19 |
| P-Ind2           | 6                                  | 2     | <2.0  | 4.00  | 70.71 | <2.0         | <2.0 | <2.0 | n/a   | n/a   |
| Media            | 15.00                              | 14.00 | 10.00 | 13.00 | 20.35 |              |      |      |       |       |
| LPS              | 30.00                              | 21.00 | 26.00 | 25.67 | 17.57 |              |      |      |       |       |

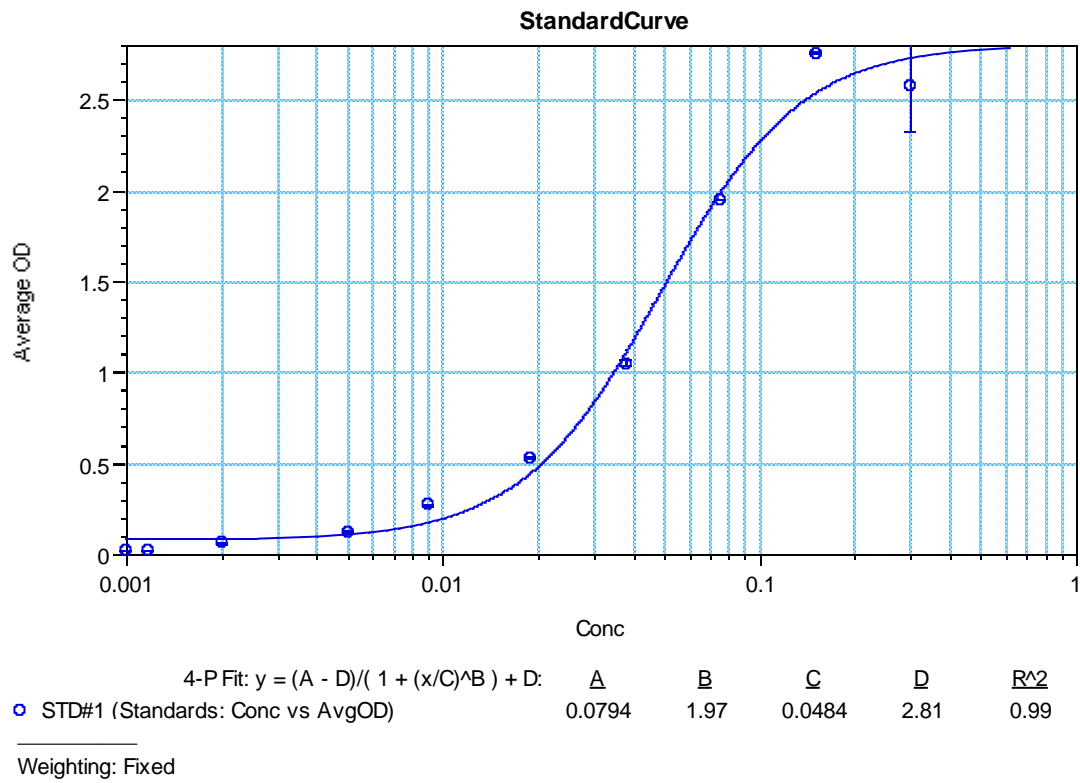

**Figure S11:** A representative 4-parameter logistic plot of IL-10 standard samples of 9 points showing the values of a, b, c, and d constants and the calibration equation with a good fit ( $R^2=0.99$ ). The data represents the mean  $\pm$  SD of optical density (OD) values for duplicate standard concentrations ( $n=2$ ).



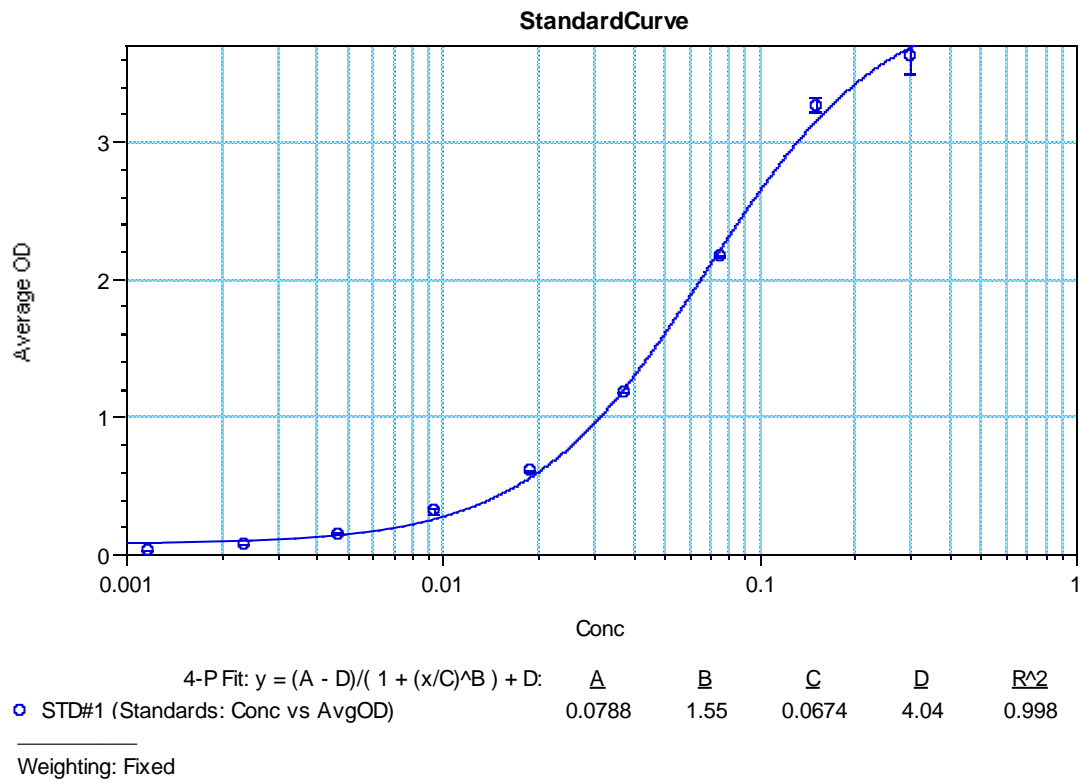

**Figure S12:** A representative 4-parameter logistic plot of IL-10 standard samples of 9 points showing the values of a, b, c, and d constants and the calibration equation with a good fit ( $R^2=0.998$ ). The data represents the mean  $\pm$  SD of optical density (OD) values for duplicate standard concentrations ( $n=2$ ).

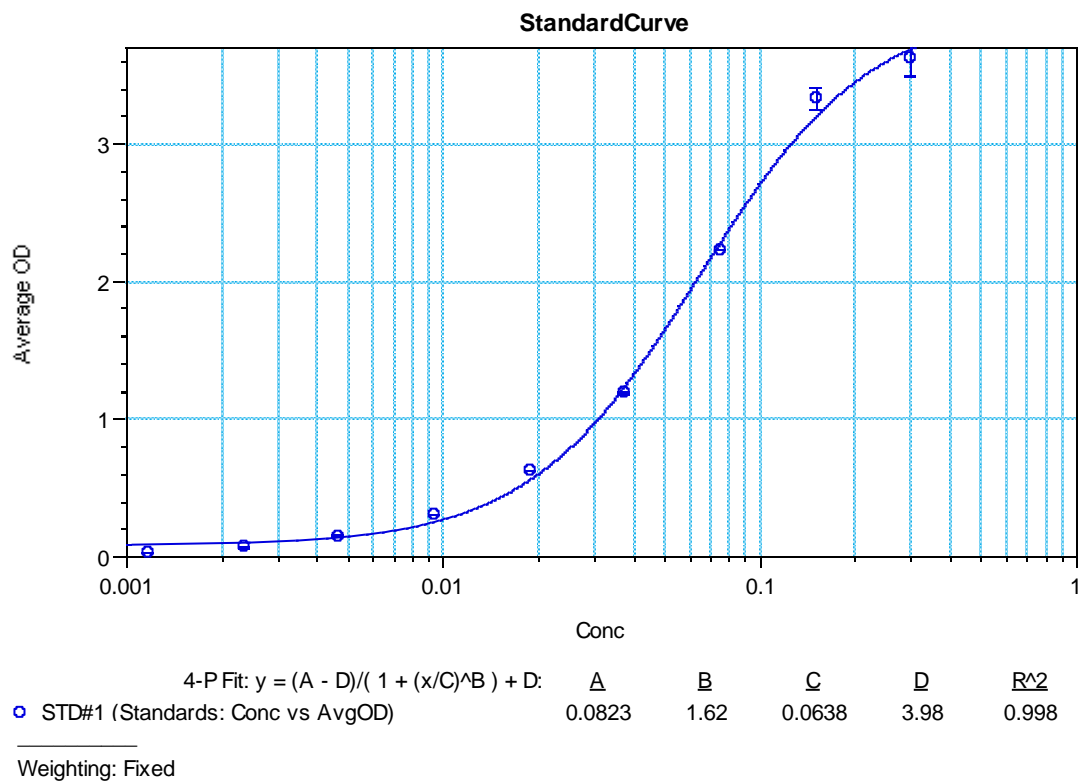

**Figure S13:** A representative 4-parameter logistic plot of IL-10 standard samples of 9 points showing the values of a, b, c, and d constants and the calibration equation with a good fit ( $R^2=0.998$ ). The data represents the mean  $\pm$  SD of optical density (OD) values for duplicate standard concentrations ( $n=2$ ).

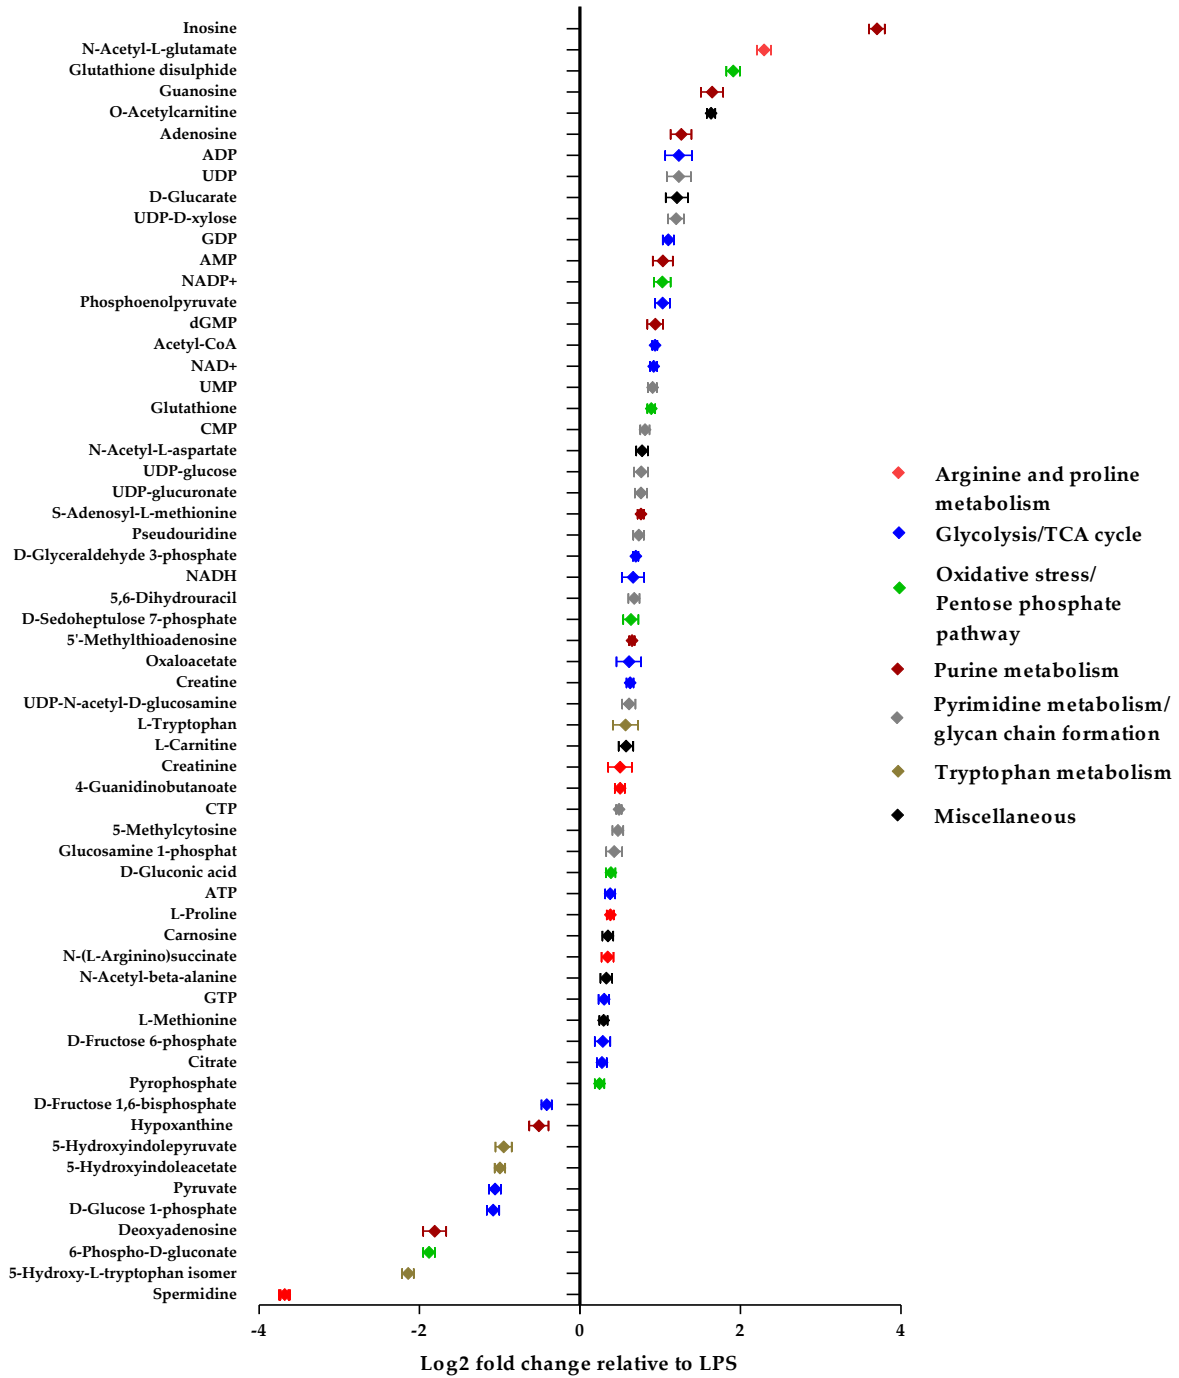

**Figure S14:** The log<sub>2</sub>- fold change between P-C+LPS and LPS alone in PMA-differentiated THP-1 cells. The y-axis plots individual metabolites. The x-axis plots log<sub>2</sub> transformed relative ratio of abundance of each metabolite in the P-C and LPS combination treatment normalized to the levels of the metabolite in the positive control LPS.

**Table S5:** List of abbreviation used in this study.

| <b>List of Abbreviations</b> |                                                           |
|------------------------------|-----------------------------------------------------------|
| HILIC                        | Hydrophilic Interaction Liquid Chromatography             |
| RP                           | Reversed Phase                                            |
| HPLC                         | High Performance Liquid Chromatography                    |
| LC-MS                        | liquid chromatography-mass spectrometry                   |
| UPLC-MS                      | Ultra-Performance Liquid Chromatograph- Mass Spectrometer |
| ELISAs                       | Enzyme-linked immunosorbent assay                         |
| SIMCA                        | Soft-Independent Modelling of Class Analogy               |
| OPLS-DA                      | Orthogonal Partial Least Squares Discriminant Analysis    |
| PCA                          | Principal Component Analysis                              |
| QC                           | Quality control                                           |
| RT                           | Retention Time                                            |
| PBS                          | Phosphate Buffered Saline                                 |
| KEGG                         | Kyoto Encyclopedia of Genes and Genomes                   |
| TCA                          | Cycle Tricarboxylic Acid cycle                            |
| OXPHOS                       | Oxidative phosphorylation                                 |
| ATP                          | Adenosine Triphosphate                                    |
| ADP                          | Adenosine Diphosphate                                     |
| NAD+                         | Nicotinamide Adenine Dinucleotide (oxidised)              |
| NADH                         | Nicotinamide Adenine Dinucleotide (reduced)               |
| NADP+                        | Nicotinamide Adenine Dinucleotide phosphate (oxidised)    |
| NADPH                        | Nicotinamide Adenine Dinucleotide phosphate (reduced)     |
| IMP                          | Inosine monophosphate                                     |
| AMP                          | Adenosine monophosphate                                   |
| CDP                          | Cytidine diphosphate                                      |
| CTP                          | Cytidine Triphosphate                                     |
| GTP                          | guanosine 5'-triphosphate                                 |
| UTP                          | Uridine-5'-triphosphate                                   |
| UDP                          | Uridine diphosphate                                       |
| UMP                          | Uridine monophosphate                                     |
| PMA                          | Phorbol 12-myristate 13-acetate                           |
| LPS                          | Lipopolysaccharide                                        |
| PAMPs                        | Pathogen-associated molecular patterns                    |
| TLRs                         | Toll-like receptors                                       |
| IDO                          | indole dioxygenase                                        |
| PNP                          | purine nucleoside phosphorylase                           |
| AHR                          | aryl hydrocarbon receptor                                 |
| ROS                          | Reactive oxygen species                                   |
| iNOS                         | Nitric oxide synthase                                     |
| NO                           | Nitric oxide                                              |
| HIF-1 $\alpha$               | Hypoxia inducible factor-1 $\alpha$                       |
| NF- $\kappa$ B               | Nuclear factor kappa B                                    |

**Table S6:** List of catalog/serial number of instruments and reagents used in this study.

| <b>Catalog/serial numbers</b>         |              |
|---------------------------------------|--------------|
| HPLC                                  | 5035.0016    |
| MS                                    | SN01059P     |
| Reveleris® iES system                 | 1912L00078   |
| plate reader                          | MV02120      |
| ZIC-pHILIC column                     | 543895       |
| TNF- $\alpha$ ELISA Ready-Set-Go kits | 88-7346-88   |
| IL-1 $\beta$ ELISA Ready-Set-Go kits  | 88-7261-88   |
| IL-6 ELISA Ready-Set-Go kits          | 88-7066-88   |
| IL-10 ELISA Ready-Set-Go kits         | 88-7106-88   |
| RPMI 1640 media                       | 15-040-CVR   |
| foetal calf serum                     | F13-1090/500 |
| L-glutamine solution                  | RNBF8011     |
| Penicillin/Streptomycin               | 015M4769V    |

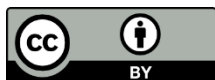

© 2019 by the authors. Submitted for possible open access publication under the terms and conditions of the Creative Commons Attribution (CC BY) license (<http://creativecommons.org/licenses/by/4.0/>).
